# Supplementary material for: Unexpected Molecular Structure of a Putative Rhenium‐Dioxo‐Benzocarbaporphyrin Complex. Implications for the Highest Transition Metal Valence in a Porphyrin‐Type Ligand Environment
Source: PubMed Central journal article supplement — ChemistryOpen. 2019 Oct 18;8(10):1298–302. doi: 10.1002/open.201900271 (PMC6804418; doi:10.1002/open.201900271), 2019-10-18
Supplement: OPEN-8-1298-s001.pdf [file OPEN-8-1298-s001.pdf]

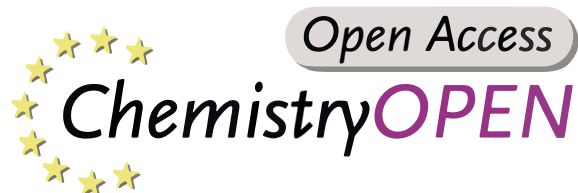

## Supporting Information

© Copyright Wiley-VCH Verlag GmbH & Co. KGaA, 69451 Weinheim, 2019

# Unexpected Molecular Structure of a Putative Rhenium-Dioxo-Benzocarboxyporphyrin Complex. Implications for the Highest Transition Metal Valence in a Porphyrin-Type Ligand Environment

Abraham B. Alemayehu, Hugo Vazquez-Lima, Simon J. Teat, and Abhik Ghosh\* © 2019 The Authors. Published by Wiley-VCH Verlag GmbH & Co. KGaA. This is an open access article under the terms of the Creative Commons Attribution Non-Commercial License, which permits use, distribution and reproduction in any medium, provided the original work is properly cited and is not used for commercial purposes.

# **Unexpected Molecular Structure of a Putative Rhenium-Dioxo-Benzocarboxporphyrin Complex. Implications for the Highest Transition Metal Valence in a Porphyrin-Type Ligand Environment**

Abraham B. Alemayehu,<sup>[a]</sup> Hugo Vazquez-Lima,<sup>[b]</sup> Simon J. Teat<sup>[c]</sup> and Abhik Ghosh\*<sup>[a]</sup>

<sup>[a]</sup> Department of Chemistry UiT – The Arctic University of Norway 9037 Tromsø, Norway

<sup>[b]</sup> Centro de Química, Instituto de Ciencias Universidad Autónoma de Puebla Edif. IC9, CU, San Manuel 72570 Puebla, Puebla, Mexico

<sup>[c]</sup> Advanced Light Source Lawrence Berkeley National Laboratory Berkeley, CA 94720-8229, USA

Correspondence: [abhik.ghosh@uit.no](mailto:abhik.ghosh@uit.no) (AG)

## A. $^1\text{H}$ NMR spectra

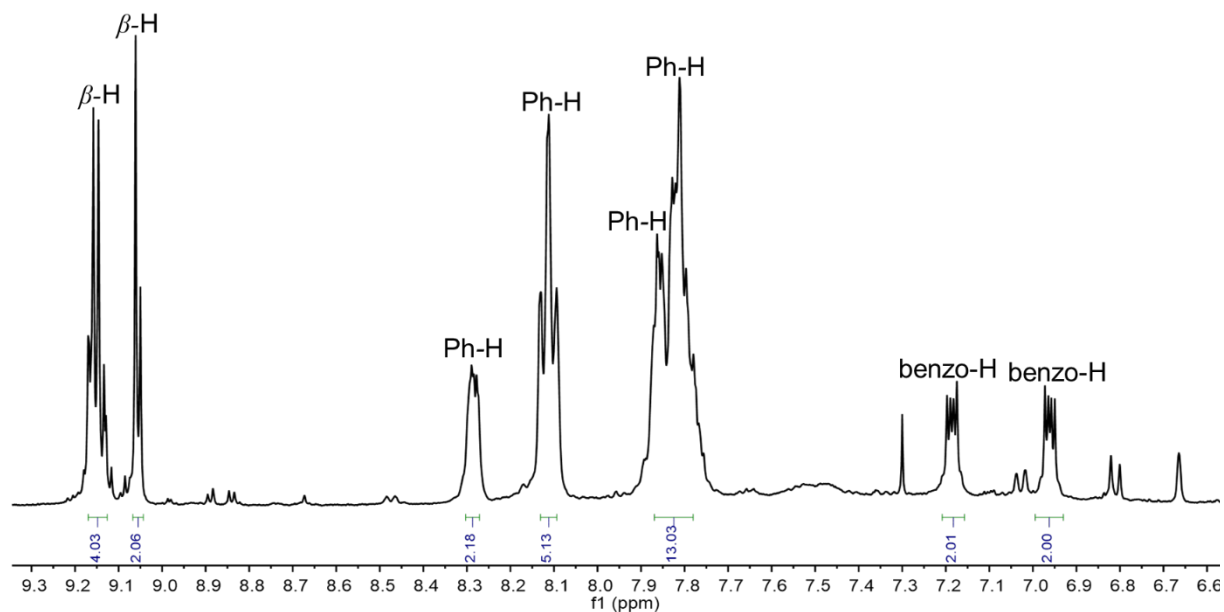

**Figure S1.**  $^1\text{H}$  NMR spectrum of  $\text{Re}[\text{TPBCP}](\text{O})$ , in  $\text{CD}_2\text{Cl}_2$  at 253 K.

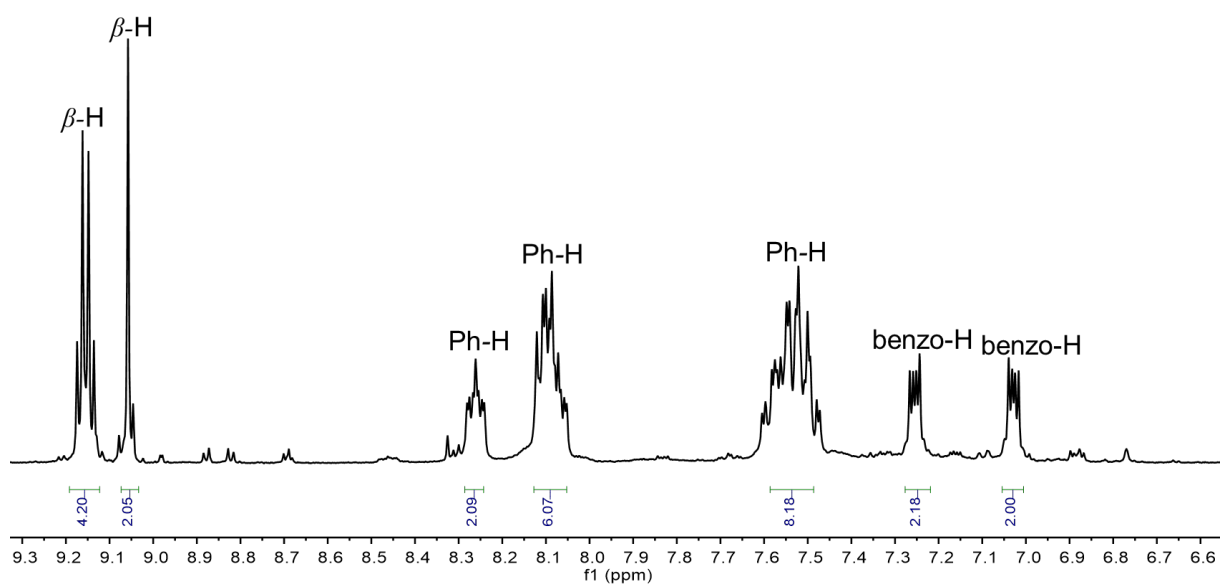

**Figure S2.**  $^1\text{H}$  NMR spectrum of  $\text{Re}[\text{TpFPBCP}](\text{O})$ , in  $\text{CD}_2\text{Cl}_2$  at 253 K.

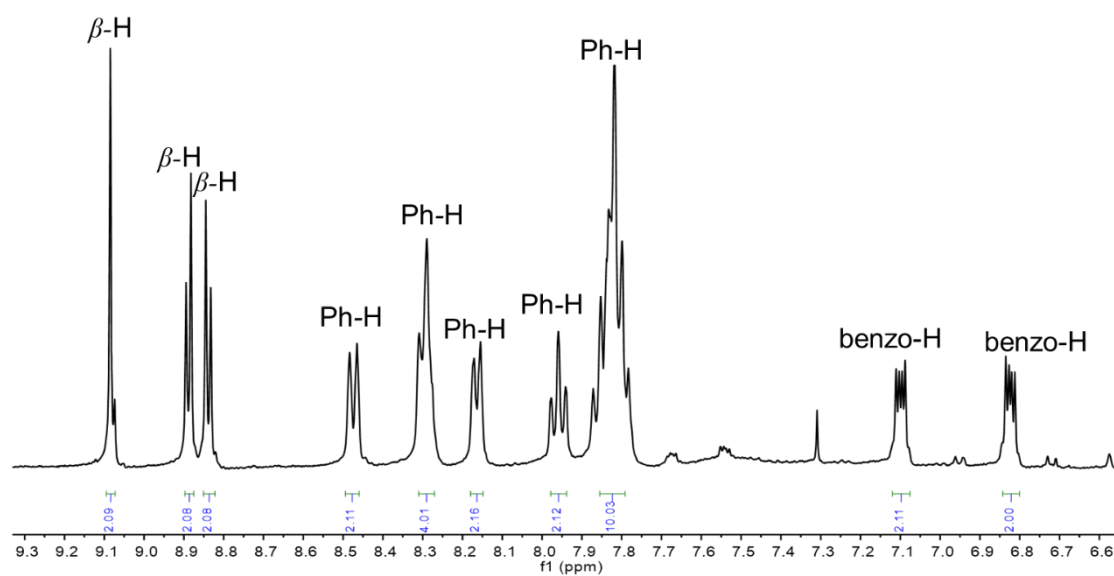

**Figure S3.**  $^1\text{H}$  NMR spectrum of  $\text{Re}[\text{TPBCP}](\text{O})_2$ , in  $\text{CD}_2\text{Cl}_2$  at 253 K.

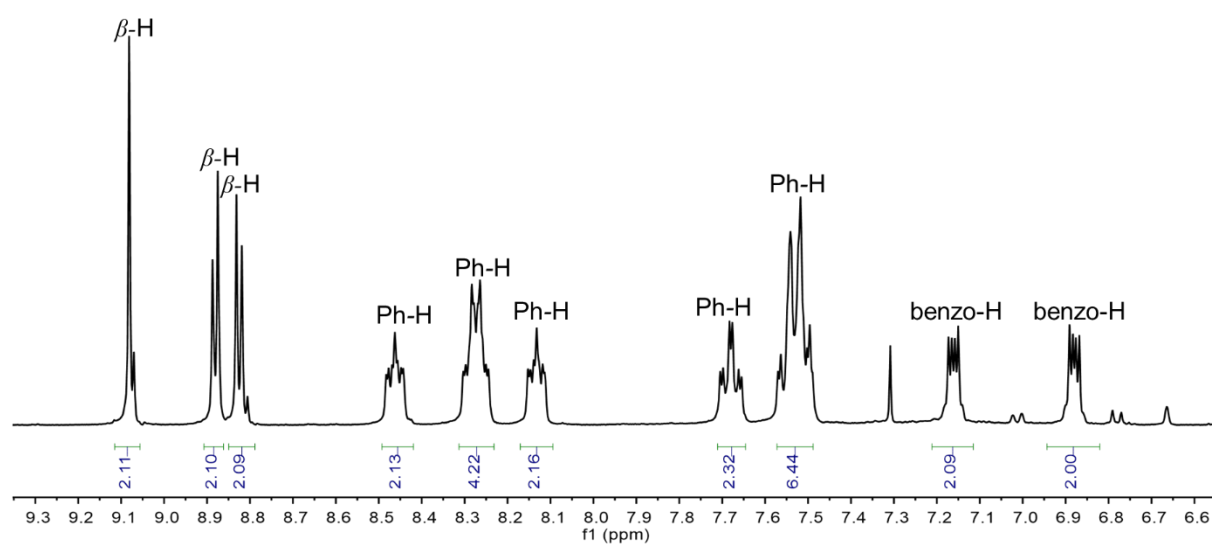

**Figure S4.**  $^1\text{H}$  NMR spectrum of  $\text{Re}[\text{TpFPBCP}](\text{O})_2$ , in  $\text{CD}_2\text{Cl}_2$  at 253 K.

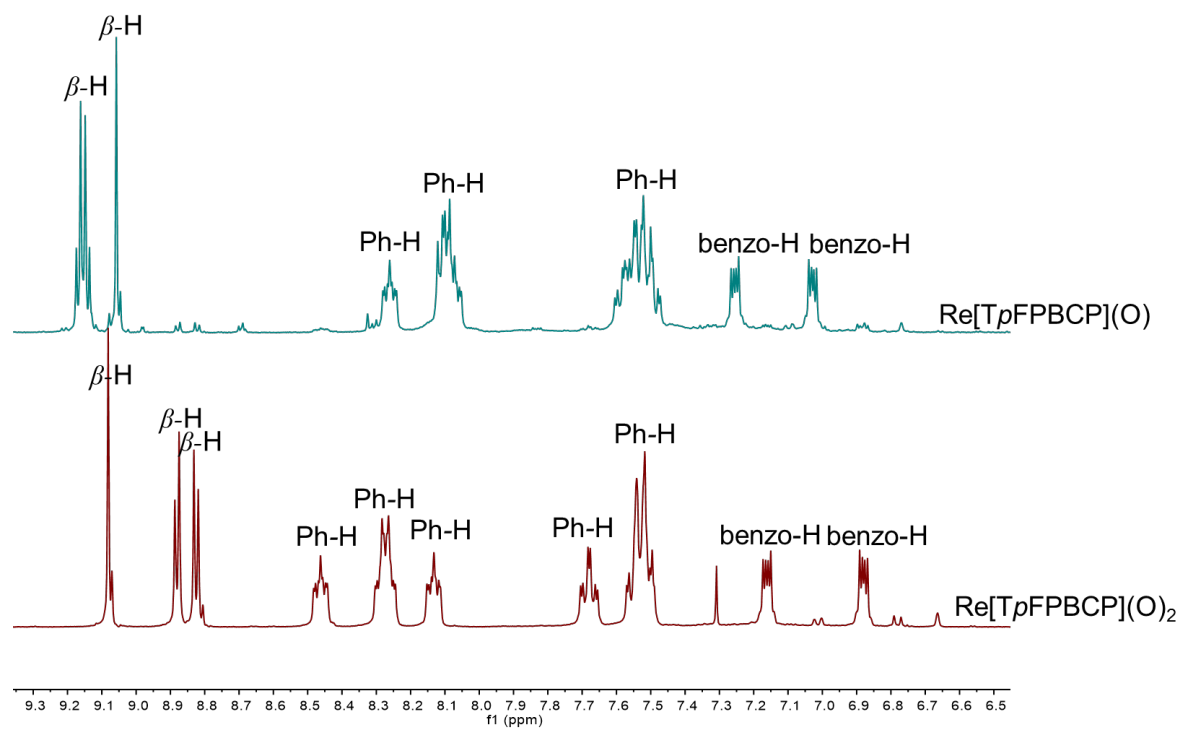

**Figure S5.** Comparison of the <sup>1</sup>H NMR spectra of Re[TpFPBCP](O) (top) and Re[TpFPBCP](O)<sub>2</sub> (bottom) in CD<sub>2</sub>Cl<sub>2</sub> at 253 K.

## B. ESI mass spectra

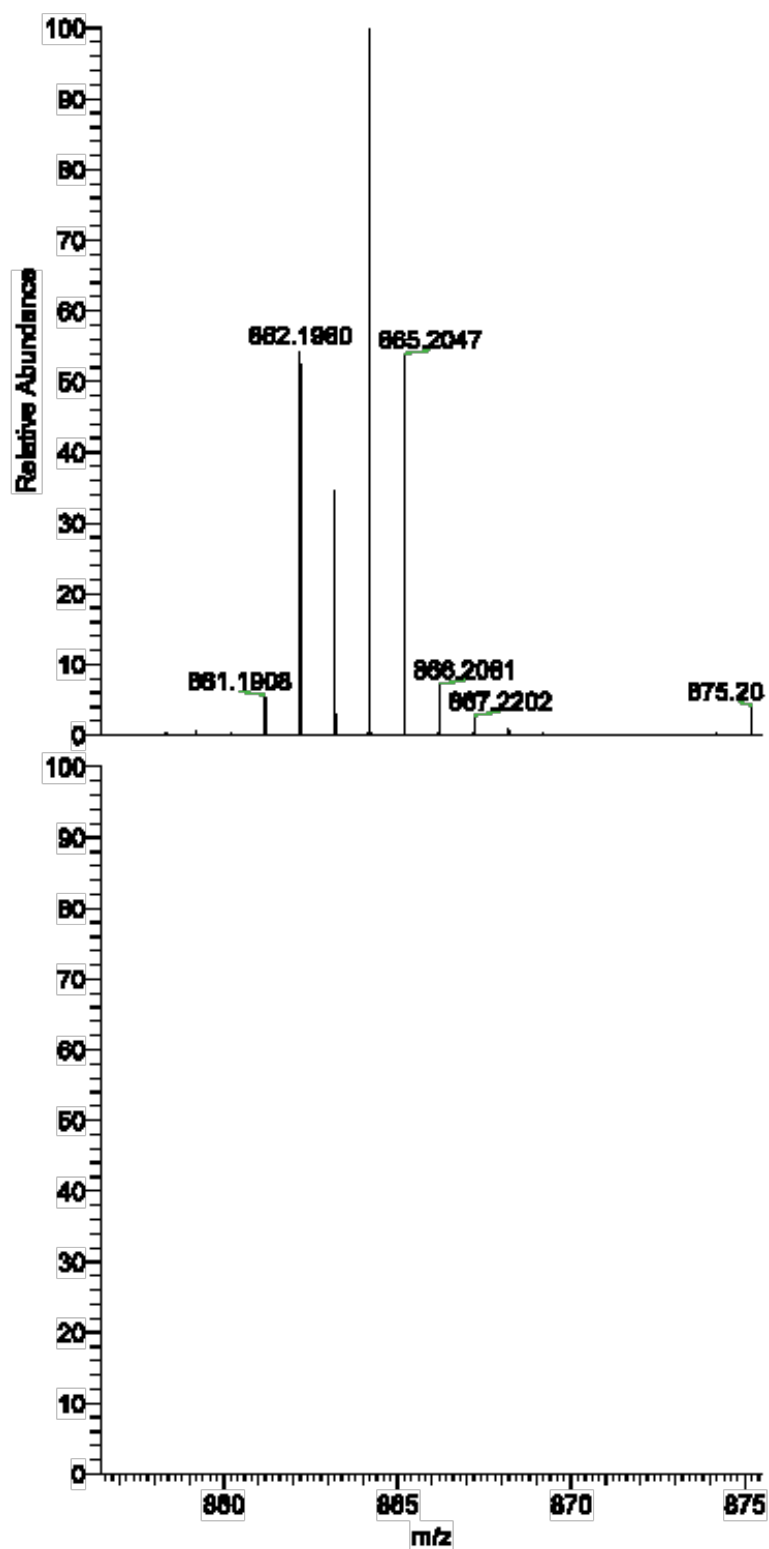

Figure S6. ESI (positive mode) MS of Re[TPBCP](O): experimental (top) and simulation (bottom).

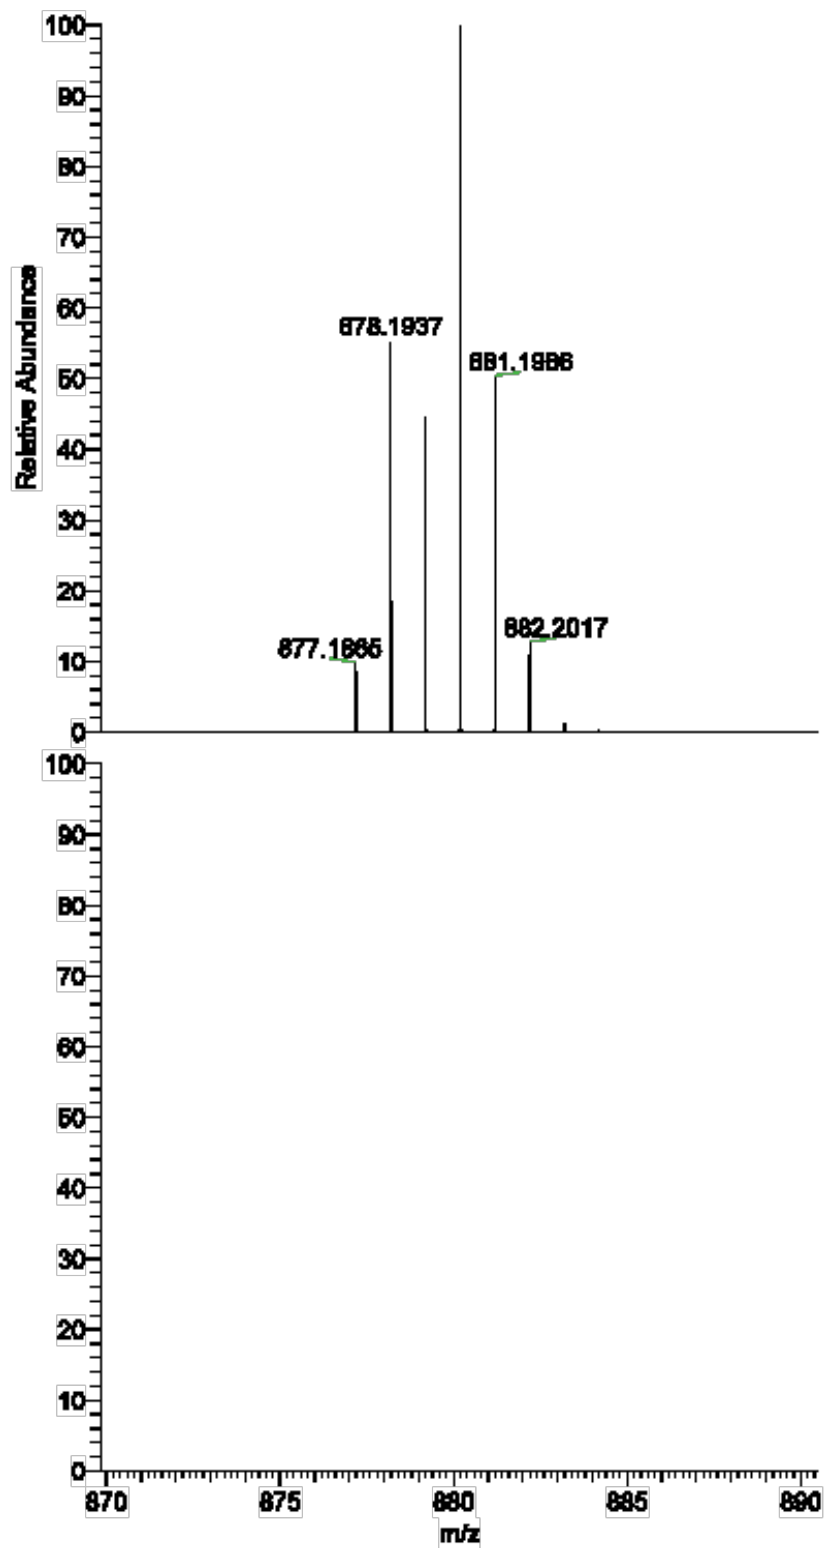

Figure S7. ESI (positive mode) MS of  $\text{Re}[\text{TPBCP}](\text{O})_2$ : experimental (top) and simulation (bottom).

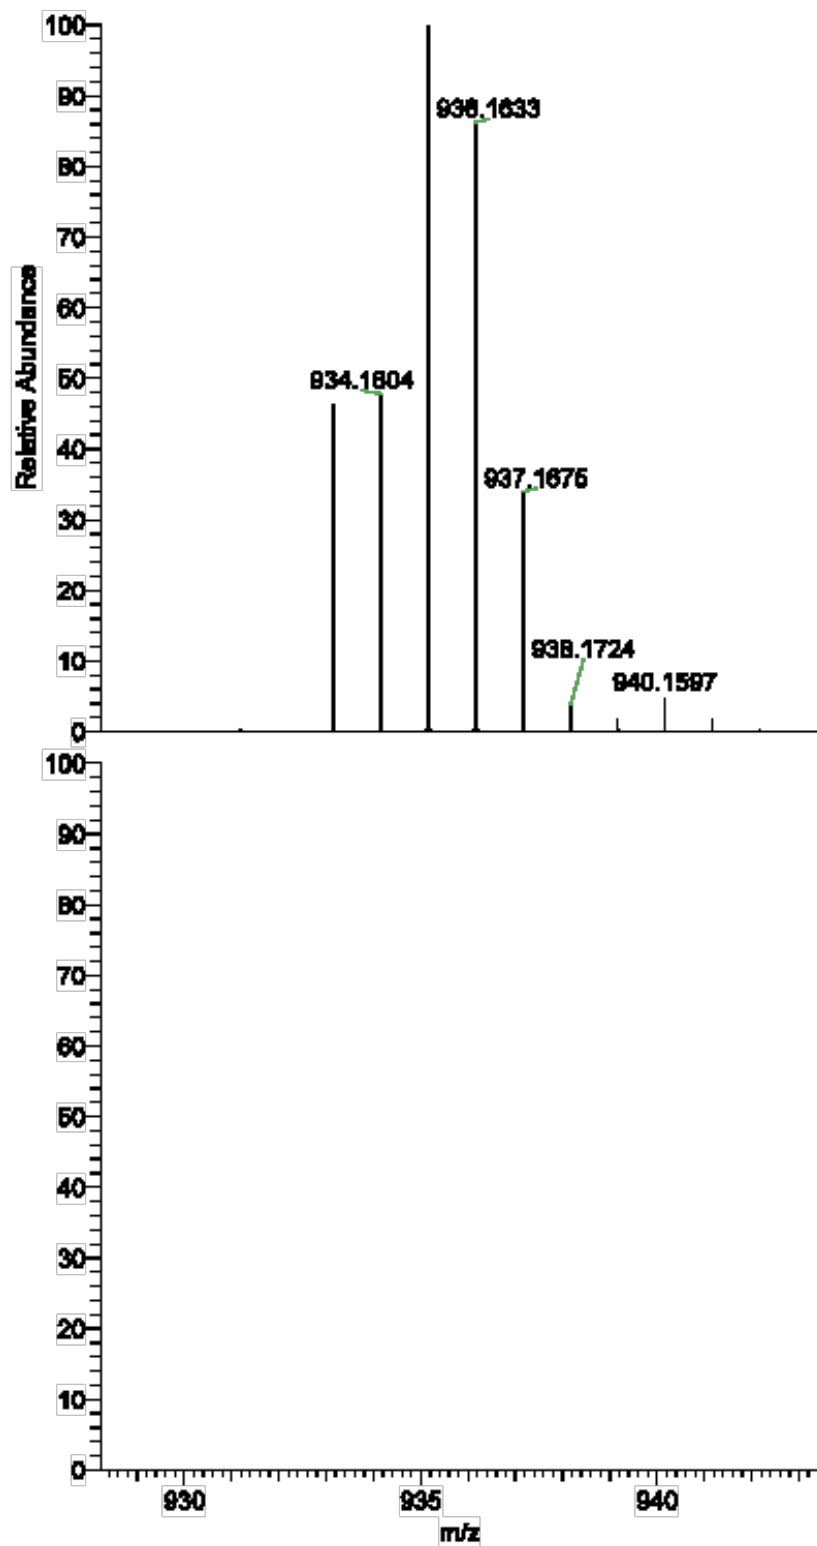

Figure S8. ESI (positive mode) MS of  $\text{Re}[\text{TpFPBCP}](\text{O})$ : experimental (top) and simulation (bottom).



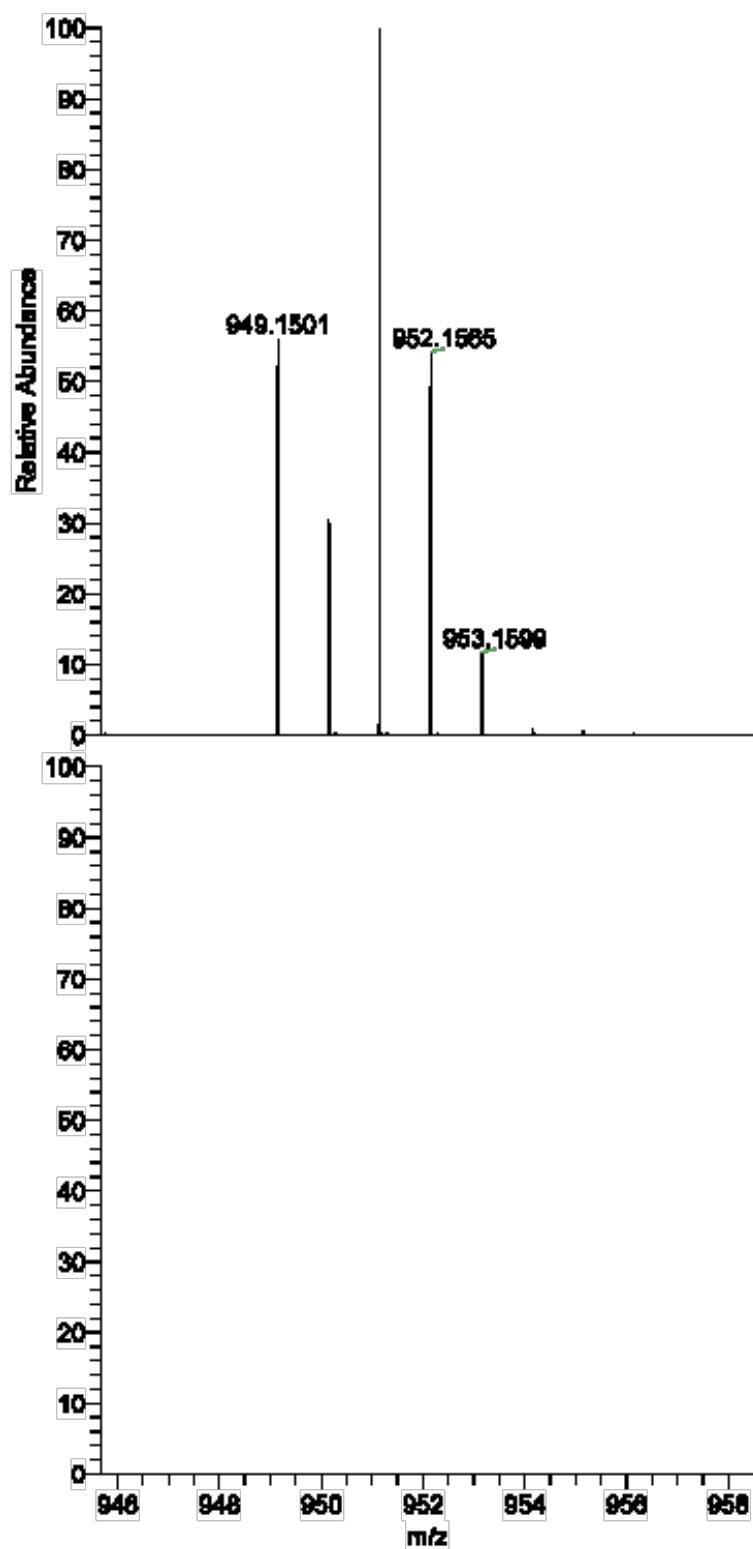

Figure S9. ESI (positive mode) MS of  $\text{Re}[\text{TpFPBCP}](\text{O})_2$ : experimental (top) and simulation (bottom).

### C. Optimized B3LYP-D3(ZORA-STO-TZ2P Cartesian coordinates (Å))

#### (a) Re [BCPO] (O) ( $C_s$ )

|    |           |           |           |
|----|-----------|-----------|-----------|
| Re | 0.600845  | -0.192344 | 0.000014  |
| O  | 0.248422  | -1.841074 | 0.000204  |
| O  | -0.403531 | 1.518931  | -0.000324 |
| N  | 0.603669  | 0.181353  | 2.059257  |
| N  | 0.603707  | 0.181195  | -2.059300 |
| N  | 2.610951  | -0.029478 | -0.000030 |
| C  | 1.295430  | 0.286239  | 4.235895  |
| C  | 1.296099  | 0.287042  | -4.235719 |
| C  | 1.704955  | 0.113960  | 2.877360  |
| C  | 1.704993  | 0.113044  | -2.877254 |
| C  | 3.011871  | -0.059614 | -2.436374 |
| C  | 3.011976  | -0.057270 | 2.436405  |
| C  | 3.434204  | -0.127184 | -1.121445 |
| C  | 3.434216  | -0.124995 | 1.121373  |
| C  | 4.779271  | -0.284531 | -0.681952 |
| C  | 4.779424  | -0.282980 | 0.682187  |
| C  | -0.053069 | 0.475897  | -4.226892 |
| C  | -0.053905 | 0.473972  | 4.226839  |
| C  | -0.495014 | 0.423287  | -2.867403 |
| C  | -0.495336 | 0.422408  | 2.867214  |
| C  | -1.554697 | 0.800953  | -0.000418 |
| C  | -1.831677 | 0.492069  | -2.469464 |
| C  | -1.831729 | 0.491431  | 2.468750  |
| C  | -2.305861 | 0.493575  | 1.168665  |
| C  | -2.306318 | 0.494178  | -1.169649 |
| C  | -3.634139 | 0.087248  | 0.707625  |
| C  | -3.634513 | 0.087220  | -0.708159 |
| C  | -4.755283 | -0.331316 | 1.409102  |
| C  | -4.756136 | -0.332114 | -1.408499 |
| C  | -5.889882 | -0.712757 | 0.697798  |
| C  | -5.890283 | -0.712890 | -0.696168 |
| H  | 1.957786  | 0.271511  | 5.086175  |
| H  | 1.958771  | 0.272793  | -5.085769 |
| H  | 3.779133  | -0.123742 | -3.195689 |
| H  | 3.779291  | -0.120973 | 3.195697  |
| H  | 5.626933  | -0.390809 | -1.339582 |
| H  | 5.626993  | -0.388190 | 1.340006  |
| H  | -0.700666 | 0.643496  | -5.072463 |
| H  | -0.701946 | 0.640048  | 5.072390  |
| H  | -2.554785 | 0.446450  | -3.275032 |
| H  | -2.555246 | 0.445061  | 3.273916  |
| H  | -4.754798 | -0.361951 | 2.490835  |
| H  | -4.756424 | -0.363685 | -2.490278 |
| H  | -6.778481 | -1.021101 | 1.232628  |
| H  | -6.779141 | -1.021847 | -1.230380 |

#### (b) Re [BCPO] (O) (symmetry-unconstrained)

|    |          |           |           |
|----|----------|-----------|-----------|
| Re | 0.207476 | -0.191020 | 1.516523  |
| O  | 0.280393 | 1.555408  | 1.241539  |
| O  | 0.431212 | -1.939536 | 1.572085  |
| N  | 0.081197 | -0.079173 | 3.589990  |
| N  | 0.381524 | -0.307287 | -0.552835 |
| N  | 2.364595 | -0.106904 | 1.709866  |

|   |           |           |           |
|---|-----------|-----------|-----------|
| C | 0.622126  | 0.001568  | 5.797920  |
| C | 1.131980  | 0.116091  | 4.462034  |
| C | 1.269274  | -0.332373 | -2.645129 |
| C | 1.565812  | -0.463690 | -1.239535 |
| C | 2.479033  | 0.217548  | 4.110912  |
| C | 2.827964  | -0.516752 | -0.661055 |
| C | 3.073310  | 0.084057  | 2.847024  |
| C | 3.214591  | -0.361391 | 0.689711  |
| C | 4.476563  | -0.031978 | 2.534361  |
| C | 4.562664  | -0.321633 | 1.204010  |
| C | -0.056371 | -0.040127 | -2.755212 |
| C | -0.604430 | -0.016379 | -1.420953 |
| C | -0.704253 | -0.309430 | 5.704368  |
| C | -1.036319 | -0.355842 | 4.310971  |
| C | -1.802733 | -0.191262 | 1.397015  |
| C | -1.973223 | 0.171603  | -1.061495 |
| C | -2.342814 | -0.534655 | 3.775121  |
| C | -2.535407 | 0.119009  | 0.195935  |
| C | -2.723695 | -0.468954 | 2.451291  |
| C | -3.962550 | 0.023280  | 0.532954  |
| C | -4.077003 | -0.350533 | 1.895133  |
| C | -5.102400 | 0.216119  | -0.237528 |
| C | -5.328344 | -0.516722 | 2.475148  |
| C | -6.349288 | 0.047242  | 0.352119  |
| C | -6.461519 | -0.317392 | 1.695714  |
| H | 1.207497  | 0.122990  | 6.694796  |
| H | 1.989837  | -0.428218 | -3.441151 |
| H | 3.163689  | 0.319421  | 4.943654  |
| H | 3.647933  | -0.616785 | -1.361605 |
| H | 5.286176  | 0.074547  | 3.237981  |
| H | 5.456458  | -0.485939 | 0.624189  |
| H | -0.617060 | 0.136464  | -3.658803 |
| H | -1.397573 | -0.482560 | 6.511286  |
| H | -2.644084 | 0.284961  | -1.905469 |
| H | -3.121833 | -0.633826 | 4.522582  |
| H | -5.027825 | 0.504913  | -1.277829 |
| H | -5.425326 | -0.807321 | 3.513150  |
| H | -7.244879 | 0.202607  | -0.234913 |
| H | -7.442805 | -0.448821 | 2.132189  |
